# Supplementary material for: Exopolysaccharides isolated from Rhizopus nigricans induced colon cancer cell apoptosis in vitro and in vivo via activating the AMPK pathway
Source: Oxford University Press journal article supplement (doi:10.1042/bsr20192774), 2020-01-01
Supplement: bsr-2019-2774_supp.pdf [file bsr-2019-2774_supp.pdf]

**Table S1** Primary antibodies.

| <b>Antibodies</b>        | <b>Types</b> | <b>Manufacturers</b>      |
|--------------------------|--------------|---------------------------|
| AMPK $\alpha$ antibody   | 2531         | Cell Signaling Technology |
| p-AMPK $\alpha$ antibody | 2531         | Cell Signaling Technology |
| LKB1 antibody            | 3047         | Cell Signaling Technology |
| p-LKB1 antibody          | 3482         | Cell Signaling Technology |
| ACC antibody             | 3662         | Cell Signaling Technology |
| p-ACC antibody           | 3661         | Cell Signaling Technology |
| $\beta$ -actin antibody  | 4970         | Cell Signaling Technology |
| mTOR antibody            | 2972         | Cell Signaling Technology |
| p-mTOR antibody          | 2971         | Cell Signaling Technology |
| 4E-BP1 antibody          | Ab32024      | Abcam                     |
| p-4E-BP1 antibody        | Ab75767      | Abcam                     |
| p70s6k antibody          | Ab9366       | Abcam                     |
| p-p70s6k antibody        | Ab60948      | Abcam                     |
| JNK antibody             | 9252         | Cell Signaling Technology |
| p-JNK antibody           | 9251         | Cell Signaling Technology |
| p53 antibody             | 2524         | Cell Signaling Technology |
| Caspase-3 antibody       | 9662         | Cell Signaling Technology |
